# Supplementary material for: Saliva levels of Abeta1-42 as potential biomarker of Alzheimer's disease: a pilot study
Source: Springer Nature journal article supplement (doi:10.1186/1471-2377-10-108), 2010-11-03

**a**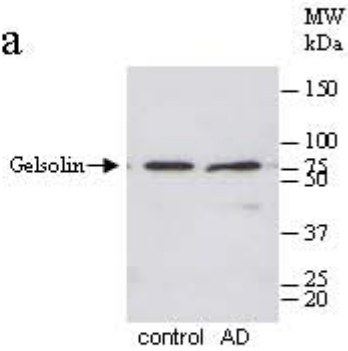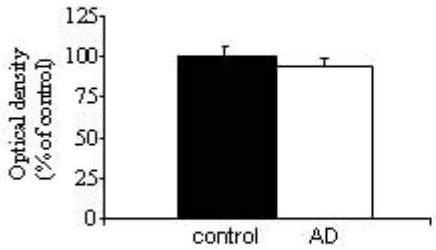**b**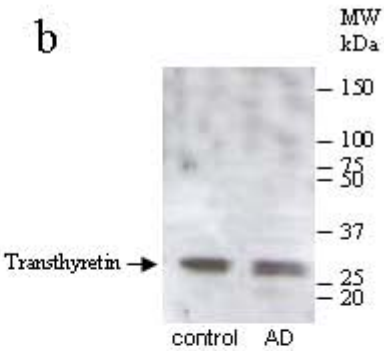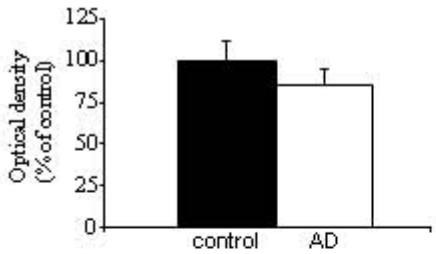

Supplement: 12883_2010_389_MOESM1_ESM.pdf [file 12883_2010_389_MOESM1_ESM.pdf]
